# Supplementary material for: Prestigious Youth are Leaders but Central Youth are Powerful: What Social Network Position Tells us About Peer Relationships
Source: Springer Nature journal article supplement (doi:10.1007/s10964-019-01080-5), 2019-07-12
Supplement: MOESM1 [file 16925670]

**Appendix**

**Latent Profile Analyses: Testing Models with between One and Five Profiles**

Latent profile analysis was used to determine whether there were clusters of social indicators that differently applied to different individuals. Before running latent profile models, intraclass correlation coefficients were computed to determine the extent to which nesting within classrooms accounted for a substantial proportion of variance in the social indicators. Nesting within classrooms accounted for between 0 (negligible) and 4.47% of variance across social indicators. Given that this is very small, multilevel modeling techniques were not employed to account for the nested structure of the data.

Several models, with between 1 to 5 latent profiles were compared by evaluating Bayesian Information Criterion (BIC), sample-size adjusted BIC (BICadj), Akaike Information Criteria (AIC), the Vuong-Lo-Mendell-Rubin Likelihood Ratio Test (VLMR-LRT), the Lo-Mendell-Rubin LRT (LMR-LRT), and the Bootstrap LRT (BLRT). Models were also compared for their entropy, as well as theoretical interpretability and rationale from prior studies (e.g., Cillessen & Rose, 2005; Pepler, Jiang, Craig, & Connolly, 2008). See Table 1 for fit statistics for all models tested. Analyses indicated that the best fitting model included 3 latent profiles. Compared to the 2-profile solution, the 3-profile solution had lower BIC, BICadj, and AIC, which indicates a better fitting model, as well as significantly improved fit according to the VLMR-LRT, LMR-LRT, and BLRT values. The 4-profile solution did have lower BIC, BICadj, and AIC than the 3-profile solution; however, it did not demonstrate a significantly improved fit based on the VLMR-LRT or LMR-LRT values. The 4-profile solution also included a very small group with only 10 individuals. Thus, the more parsimonious 3-profile solution was chosen.

References

Cillessen, A. H. N., & Rose, A. J. (2005). Understanding popularity in the peer system. *Current Directions in Psychological Science*, *14*, 102–105. https://doi.org/10.1111/j.0963-7214.2005.00343.x

Pepler, D. J., Jiang, D., Craig, W. M., & Connolly, J. A. (2008). Developmental trajectories of bullying and associated factors. *Child Development*, *79*, 325–338.

| Table 1 |  |  |  |  |  |  |  |  |
| --- | --- | --- | --- | --- | --- | --- | --- | --- |
| *Fit statistics for latent profile analysis of social indicators* | | | | | | | | |
| Classes | BIC | BICadj | AIC | VLMR-LRT *p*-value | LMR-LRT *p*-value | BLRT  *p*-value | Entropy | Class proportions:  N (%) |
| 1 | -8441.04 | -8498.15 | -8512.71 | ─ | ─ | ─ | ─ | 396 (100%) |
| 2 | -9421.09 | -9509.94 | -9532.57 | .03 | .03 | <.001 | .97 | 62 (16%) 333 (84%) |
| 3 | -9783.18 | -9903.75 | -9934.47 | .05 | .05 | <.001 | .94 | 62 (16%)  55 (14%)  279 (70%) |
| 4 | -10082.6 | -10234.90 | -10273.70 | .15 | .15 | <.001a | .96 | 10 (3%)  63 (16%)  269 (68%)  54 (13%) |
| *Note.* BIC = Bayesian Information Criterion; BICadj = Sample Size Adjusted BIC; AIC = Akaike Information Criterion; VLMR-LRT = Vuong-Lo-Mendell-Rubin Likelihood Ratio Test; LMR-LRT = Lo-Mendell-Rubin LRT; BLRT = Bootstrap LRT. Each model was re-run with twice the random starts and the best log likelihood was replicated. | | | | | | | | |
| A model with 5 profiles was tested but did not converge and is thus not included in the table. | | | | | | | | |
| aThis *p* value may not be trustworthy due to local maxima. | | | | | | | | |
